# Supplementary material for: A three-dimensional culture system recapitulates placental syncytiotrophoblast development and microbial resistance
Source: PubMed Central journal article supplement — Sci Adv. 2016 Mar 4;2(3):e1501462. doi: 10.1126/sciadv.1501462 (PMC4783126; doi:10.1126/sciadv.1501462), 2016-03-04
Supplement: 1501462_SM.pdf [file 1501462_SM.pdf]

## Supplementary Materials for

### **A three-dimensional culture system recapitulates placental syncytiotrophoblast development and microbial resistance**

Cameron A. McConkey, Elizabeth Delorme-Axford, Cheryl A. Nickerson, Kwang Sik Kim, Yoel Sadovsky, Jon P. Boyle, Carolyn B. Coyne

Published 4 March 2016, *Sci. Adv.* **2**, e1501462 (2016)  
DOI: 10.1126/sciadv.1501462

#### **This PDF file includes:**

Fig S1. Monotypic cultures of human trophoblast cell lines are not compatible with culturing in the RWV bioreactor.

Fig S2. Coculturing of JEG-3 cells with human microvascular endothelial cells promotes their attachment to Cytodex beads in the RWV bioreactor.

Fig S3. Human microvascular cells are removed from Cytodex beads by JEG-3 cells.

Fig S4. Levels of pregnancy hormones increase during culturing of JEG-3 cells in 3D.

Fig S5. JEG-3 cells cultured in 3D express high levels of syncytin, form brush borders, and can be transfected with siRNAs.

Fig S6. GSEA plots of genes with higher or lower abundance in JEG-3 cells cultured in 2D or 3D or in primary human trophoblasts.

Table S1. Thirteen “core” genes identified using GSEA gene clustering as being up-regulated in both 3D JEG-3 and PHT cells, while being of low abundance in both 2D JEG-3 cells and 3D HBMECs.

Table S2. Spreadsheet of gene expression profiles from RNASeq in 2D and 3D cultures of JEG-3 cells, PHT cells, and 3D cultures of HBMECs.

Legends for data set S1 to S4

#### **Other Supplementary Material for this manuscript includes the following:**

(available at [advances.sciencemag.org/cgi/content/full/2/3/e1501462/DC1](http://advances.sciencemag.org/cgi/content/full/2/3/e1501462/DC1))

Data set S1 (Microsoft Excel format). Spreadsheet from RNASeq studies of 2D and 3D cultures of JEG-3 cells, PHT cells, and 3D cultures of HBMECs. Shown

are gene symbols, normalized expression values, and RPKM values from each condition.

Data set S2 (Microsoft Excel format). Spreadsheet from differential expression analyses using DESeq2 of 2D and 3D cultures of JEG-3 cells.

Data set S3 (Microsoft Excel format). Spreadsheet from differential expression analyses using DESeq2 of 2D and 3D cultures of HBMECs.

Data set S4 (Microsoft Excel format). Spreadsheet from differential expression analyses using DESeq2 of 2D cultures of JEG-3 cells and PHT cells.

Supplemental Figure 1

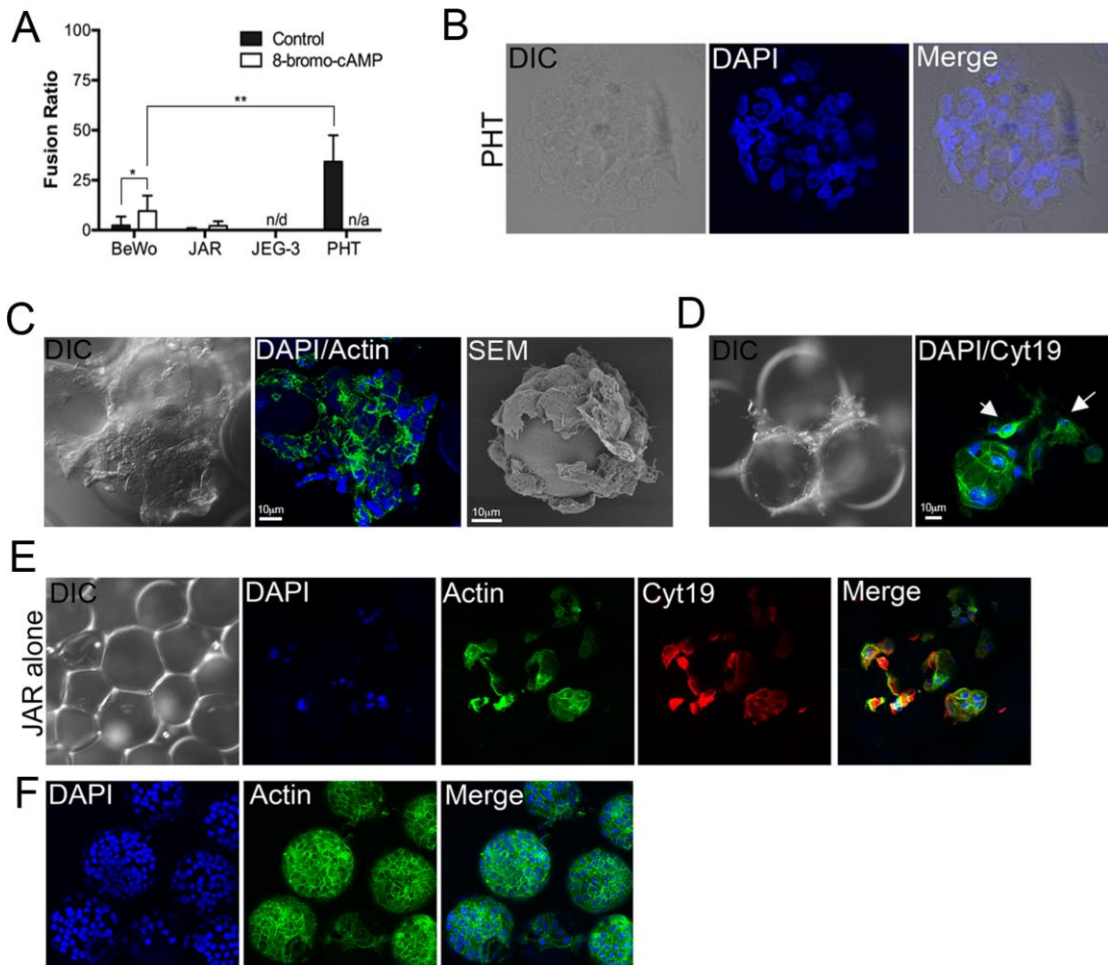

**Supplemental Figure 1.** (A), Fusion ratio of the indicated trophoblast cell lines (BeWo, JAR, or JEG-3) or PHT cells under mock-treated (control) conditions or when treated with 8-bromo-cAMP (for 48hrs). Not applicable (n/a) or not detected (n/d). Data are shown as mean  $\pm$  standard deviation and are based upon analyses of >250 total nuclei from three independent experiments or PHT preparations. \*\* $p < 0.01$ , \* $p < 0.05$ . (B) Confocal microscopy of PHTs isolated from normal term deliveries and grown in culture. Cell nuclei (DAPI; blue) and differential interference contrast (DIC) images demonstrate a differentiated, multinucleated syncytiotrophoblast. (C), At left, differential interference contrast (DIC, far left panel) and actin localization (green, second from left) of JEG-3 cells cultured in the RWV bioreactor for 21 days. DAPI-stained nuclei are shown in blue. (D), Differential interference contrast (DIC, left panel) and actin localization of (green, right panel) of BeWo cells cultured in the RWV bioreactor for 21 days. DAPI-stained nuclei are shown in blue. (E) Confocal microscopy for actin (green) and cytokeratin-19 (red) in JAR cells cultured in 3-D for 21 days. DAPI-stained nuclei are shown in blue. Differential interference contrast (DIC). (F), Confocal microscopy for actin (green) in JEG-3 cells cultured on Cytodex beads under static 2-D conditions for 7 days. DAPI-stained nuclei are shown in blue.

Supplemental Figure 2

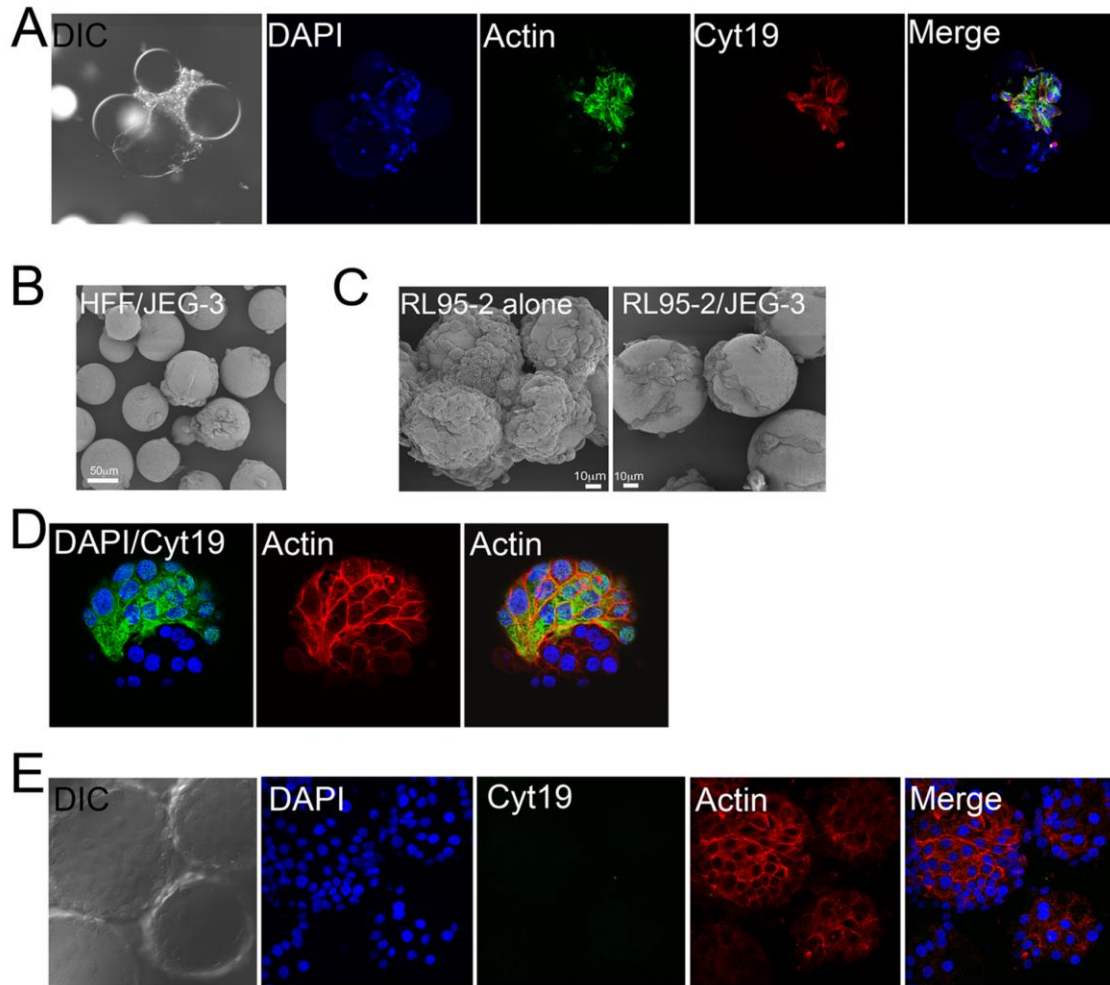

**Supplemental Figure 2.** (A), Confocal microscopy for actin (green) and cytokeratin-19 (red) in BeWo cells cocultured with HBMEC in 3-D for 21 days. DAPI-stained nuclei are shown in blue. Differential interference contrast (DIC). (B), Scanning electron micrographs of HFF and JEG-3 cells co-cultured in 3-D for 21 days. (C), Scanning electron micrographs of RL95-2 cells cultured in 3-D for 21 days alone (left panel) or RL95-2 cells cocultured with JEG-3 cells (right panel). (D), Confocal microscopy for cytokeratin-19 (green) and actin (red) in JEG-3 cells cocultured with HBMEC in 3-D for 10 days. DAPI-stained nuclei are shown in blue. (E), Confocal microscopy for cytokeratin-19 (green) and actin (red) in Htr8/SVneo cells cocultured with HBMEC in 3-D for 21 days. DAPI-stained nuclei are shown in blue. Differential interference contrast (DIC).

Supplemental Figure 3

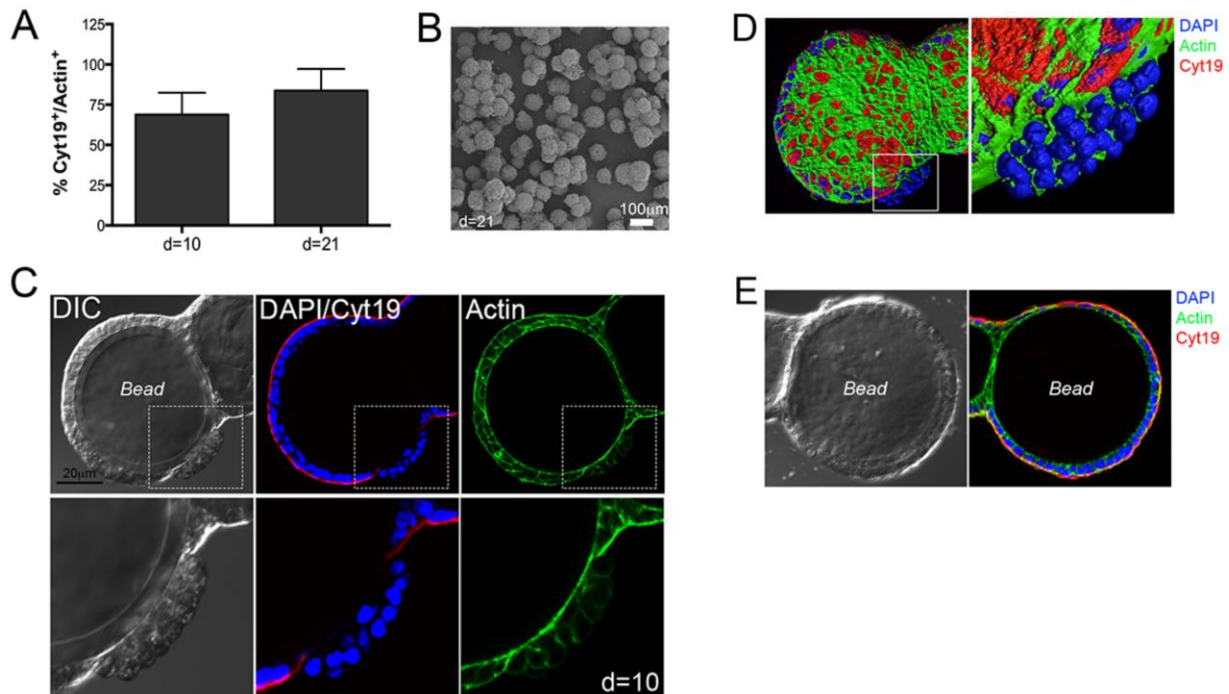

**Supplemental Figure 3.** (A), Image analysis of the percent cytokeratin-19-positive cells relative to total actin positive cells at the indicated time of JEG-3/HBMEC co-culture in 3-D. In both cases, >700 total nuclei were used for quantification. Data are shown as mean  $\pm$  standard deviation. (B), Scanning electron micrographs of HBMEC cultured alone 3-D for 21 days. (C), Top, confocal microscopy cross-section of cytokeratin-19 (red) and actin (green) in JEG-3/HBMEC co-cultured Cytodex beads cultured for 10 days. At bottom, zoomed region of hatched white box shown in top row. DAPI-stained nuclei are shown in blue. (D), Three-dimensional image reconstruction of bead shown in panel (C) demonstrating the extrusion of HBMEC (cytokeratin-19 negative) from the bead surface. At right, zoomed region shown in white box at left. (E), Confocal microscopy cross-section of cytokeratin-19 (red) and actin (green) in JEG-3/HBMEC co-cultured Cytodex beads cultured for 21 days. DAPI-stained nuclei are shown in blue. Note the single cell layer coating the bead surface. In (C) and (E), the bead is labeled with white text.

Supplemental Figure 4

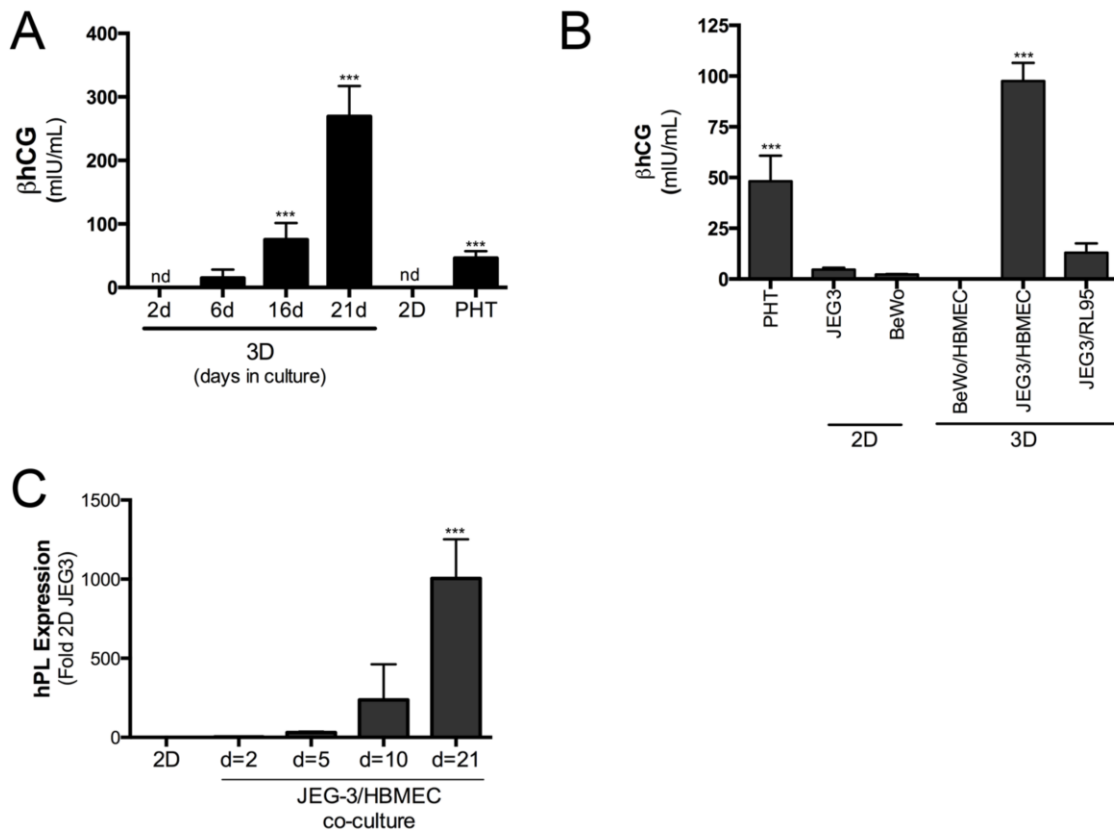

**Supplemental Figure 4.** (A), ELISAs for  $\beta$ hCG from supernatants of JEG-3 cells cultured in two-dimensions (2-D for 72-96hrs) or three-dimensions (3-D, for 21 days) at the indicated days post co-cultured with HBMEC, or from PHT cells (blue, cultured 48-72hrs). In all cases, media was replaced ~24hrs prior to ELISA. (B), ELISAs for  $\beta$ hCG from supernatants of JEG-3 or BeWo cells cultured in 2-D or 3-D cocultured with wither HBMEC or RL95-2 cells, or from PHT cells. In all cases, media was replaced ~24hrs prior to ELISA. (C), Expression of human placental lactogen (hPL) as assessed by RT-qPCR in JEG-3 cells cultured in 2-D, or in JEG-3 cells cultured in 3-D for the indicated days post co-culture. In all, data are shown as mean  $\pm$  standard deviation, \*\*\*p<0.001.



Supplemental Figure 5

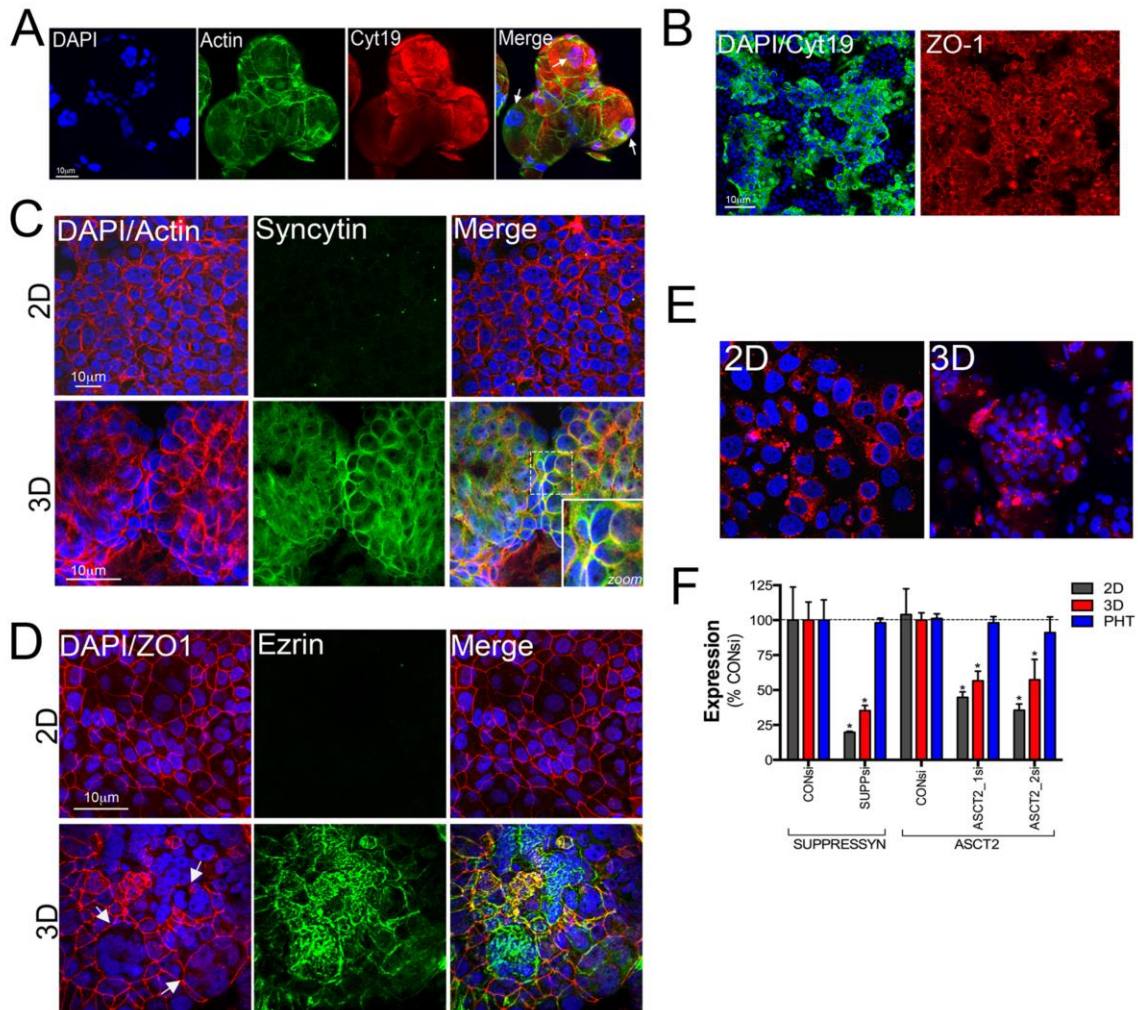

**Supplemental Figure 5.** (A), Confocal microscopy for actin (green) and cytokeratin-19 (red) in 3-D cultures of JEG-3 cells after 21 days. DAPI-stained nuclei are shown in blue. White arrows denote large syncytia. (B), Confocal microscopy for ZO-1 (red) and cytokeratin-19 (green) in JEG-3 and HBMEC co-cultured in 2-D for 10 days. DAPI-stained nuclei are shown in blue. (C), Confocal microscopy for actin (red) and syncytin (green) in JEG-3 cells cultured in 2-D (top row) or 3-D (bottom row). DAPI-stained nuclei are shown in blue. (D), Confocal microscopy for ZO-1 (red) and ezrin (green) in JEG-3 cells cultured in 2-D (top row) or 3-D (bottom row). DAPI-stained nuclei are shown in blue. White arrows denote syncytia. (E), Cy3-conjugated scrambled siRNA (red) ~48hrs following transfection in 2-D (left) or 3-D (right) cultures of JEG-3 cells. DAPI-stained nuclei are shown in blue. (F), RT-qPCR for suppressyn or ASCT2 in 2-D or 3-D JEG-3 cultures or PHT cells transfected with scrambled control siRNAs (CONSi) or with siRNAs against suppressyn (SUPPSi) or ASCT2 (ASCT2si). Data are shown as mean  $\pm$  standard deviation, \* $p < 0.05$ .

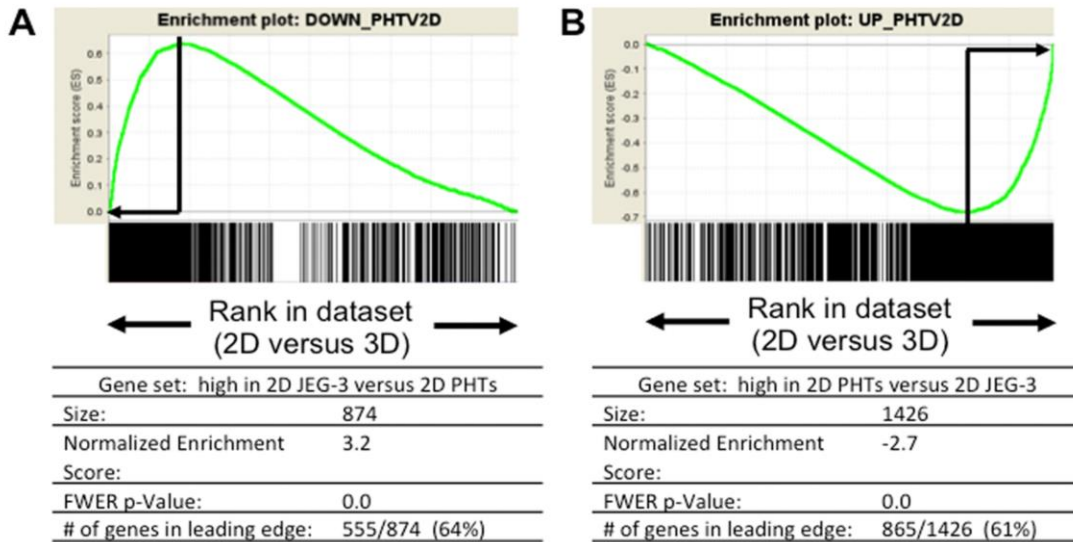

**Supplemental Figure 6.** GSEA enrichment plots and corresponding statistical output for (A) a gene set containing all transcripts that were of higher abundance in 2D JEG-3 compared to PHTs (“2D JEG3 UP”) and (B) a gene set containing all transcripts that were of higher abundance in PHTs compared to 2D JEG-3 (“PHT enriched”). Both gene sets were significantly (FWER=0.0) enriched in transcripts that differed between 2-D and 3-D JEG-3, providing further evidence for the high similarity between 3-D JEG-3 cultures and PHT cells.



| Feature ID | 2D-1 Normalized expression values | 2D-1 Unique gene reads | 2D-1 Total gene reads | 2D-1 RPKM   | 2D-2 Normalized expression values | 2D-2 Unique gene reads | 2D-2 Total gene reads | 2D-2 RPKM   | PHT Normalized expression values | PHT Total gene reads | PHT - Unique gene reads | PHT - RPKM  |
|------------|-----------------------------------|------------------------|-----------------------|-------------|-----------------------------------|------------------------|-----------------------|-------------|----------------------------------|----------------------|-------------------------|-------------|
| FBN1       | 0.1                               | 60                     | 60                    | 0.08906576  | 0.1                               | 69                     | 69                    | 0.09320361  | 32.4                             | 16751                | 16751                   | 29.58801111 |
| KIAA0040   | 0                                 | 9                      | 9                     | 0.046941608 | 0.1                               | 14                     | 14                    | 0.075389298 | 47.3                             | 7307                 | 7307                    | 43.25741741 |
| CYP27A1    | 0                                 | 24                     | 24                    | 0.047002587 | 0.1                               | 55                     | 55                    | 0.12077957  | 48.4                             | 4668                 | 4668                    | 44.21892307 |
| CD14       | 0.1                               | 6                      | 6                     | 0.089210212 | 0.1                               | 8                      | 8                     | 0.117557862 | 24.1                             | 1443                 | 1443                    | 22.03852404 |
| RARRES3    | 0.2                               | 11                     | 11                    | 0.151110241 | 0.1                               | 4                      | 4                     | 0.064005233 | 28.7                             | 1136                 | 1136                    | 24.38110599 |
| ERVMER34-1 | 0.2                               | 29                     | 29                    | 0.158194774 | 0                                 | 24                     | 24                    | 0.040786263 | 25.6                             | 3497                 | 3497                    | 23.43202543 |
| SEMA3B     | 0.1                               | 12                     | 12                    | 0.058349388 | 0                                 | 11                     | 11                    | 0.048056643 | 41.4                             | 7719                 | 7719                    | 37.8222129  |
| ITGB6      | 0                                 | 38                     | 38                    | 0.035339311 | 0                                 | 66                     | 66                    | 0.04802409  | 25.9                             | 5827                 | 5827                    | 23.70522774 |
| EMP1       | 0                                 | 6                      | 6                     | 0.036004806 | 0                                 | 6                      | 6                     | 0.035584335 | 19.4                             | 2882                 | 2882                    | 17.68434825 |
| SPP1       | 0.1                               | 6                      | 6                     | 0.07353604  | 0                                 | 1                      | 1                     | 0.012112878 | 133.1                            | 9660                 | 9660                    | 121.6554324 |
| HTRA1      | 0                                 | 4                      | 4                     | 0.013227237 | 0.1                               | 15                     | 15                    | 0.078436602 | 209.7                            | 14554                | 14554                   | 191.6514178 |
| CDKN1C     | 0.1                               | 10                     | 10                    | 0.108436749 | 0.1                               | 14                     | 14                    | 0.150038563 | 1273.1                           | 104444               | 104444                  | 1163.443098 |
| S100A9     | 0.1                               | 3                      | 3                     | 0.145797825 | 0.1                               | 3                      | 3                     | 0.14409497  | 343                              | 6400                 | 6400                    | 313.4382118 |

**Supplemental Table 1.** Thirteen “core” genes identified using GSEA gene clustering as being up-regulated in both 3D JEG-3 and PHT cells, while being of low abundance in both 2D JEG-3 cells and 3D HBMECs. These data were used as a template for Pavlidis template matching as described in the text. Shown are gene symbols, normalized expression values, and RPKM values from each condition.

| Feature ID | 2D1        | 2D2        | 3D1             | 3D2        | PHT       | 3DHBMEC    |
|------------|------------|------------|-----------------|------------|-----------|------------|
| CDKN1C     | -4.6153584 | -4.1468787 | 1.5144567       | 0.2626656  | 8.773901  | -1.7887869 |
| PSG1       | -3.921119  | -3.9380667 | 0.22617082      | 0.7427797  | 9.460972  | -2.1183948 |
| S100A9     | -3.287176  | -3.3041232 | 1.1652021       | 2.2976515  | 7.7828217 | -4.6543765 |
| PSG5       | -1.4406893 | -3.0425992 | 1.4121387       | -0.6632169 | 8.027683  | -4.293317  |
| COL3A1     | -3.8660176 | -3.298002  | 0.45486197      | 2.908913   | 4.709969  | NaN        |
| CST6       | -3.3526158 | -3.1996381 | 0.92729485      | 1.7335161  | 3.8914433 | NaN        |
| PGLYRP4    | -3.6192062 | -2.051191  | 0.07574192      | 2.4452305  | 3.149425  | NaN        |
| TLR3       | -3.4982266 | -1.7782086 | 0.5725885       | 0.5515633  | 4.847786  | 0.69550234 |
| INHA       | -3.215372  | -2.8697493 | 0.7837297       | 1.2734401  | 5.584989  | -1.5570376 |
| MX2        | -3.1090999 | -3.5410843 | 0.50641423      | 1.3866765  | 6.0634685 | -1.306375  |
| DPEP2      | -2.7727022 | NaN        | 0.2848162       | -0.7526594 | 5.7954855 | -2.5549402 |
| MEST       | -2.004034  | -2.4360187 | 0.29859698      | 0.73482716 | 6.4559345 | -3.0493062 |
| GLI3       | -1.6825411 | -1.6994882 | 0.10452571      | 1.0758541  | 5.04494   | -2.8432908 |
| PDE10A     | -1.883922  | -1.2227973 | 0.12185921<br>5 | 1.3585134  | 4.8581533 | -2.9880881 |
| C1orf132   | -1.943281  | -2.6606684 | 0.4137977       | 0.5260693  | 4.6306095 | 0.96652734 |
| PDCD1LG2   | -2.528641  | -2.8086226 | 0.79635787      | 0.15436682 | 4.386539  | NaN        |
| SLC15A3    | -2.6784124 | -1.7161185 | 0.8078183       | 0.46973506 | 5.1219487 | -2.004971  |
| COL1A2     | -2.2726433 | -1.8745531 | 0.02998750<br>1 | 1.1624368  | 5.0096536 | -2.0548813 |
| TRIM22     | -2.2016459 | -2.2185931 | 0.40841398      | 1.9394126  | 4.056296  | -1.9838837 |
| ZNF703     | -1.7419285 | -2.5280955 | 0.12697016      | 1.1411628  | 4.4938407 | -1.2380093 |
| SCNN1A     | -1.91741   | -1.9343573 | 0.02981651<br>8 | 0.8681675  | 4.034992  | -1.021576  |
| SRGAP3     | -2.2366235 | -1.4055741 | 0.08599587<br>5 | 0.9850531  | 3.4989674 | -0.7558271 |
| BST2       | -2.1571171 | -1.3280676 | -0.1719128      | 1.0392485  | 3.806743  | -1.1908938 |
| IL2RG      | -2.2775428 | -1.4464931 | 0.01143780<br>4 | 1.3863561  | 3.4828992 | -1.1337814 |
| KCNH7      | -1.8846995 | NaN        | -0.4121433      | 0.13534348 | 3.8284366 | -1.6669375 |
| IRF8       | -2.0342352 | -1.3593049 | -0.3235194      | 0.07077594 | 3.7878354 | NaN        |
| VWA5A      | -1.9947506 | -1.3137263 | 0.14918274      | 0.11086799 | 4.2087436 | -1.1603171 |
| PCDH1      | -2.3226817 | -1.2267348 | 0.08701438<br>5 | 0.16994983 | 4.3587503 | -1.0662982 |
| GPR115     | -1.2335644 | -1.3451484 | 1.3702362       | 1.0235177  | 4.1780415 | -3.9930823 |
| NUPR1      | -0.8889548 | -1.6899252 | 0.78675747      | 1.0436988  | 3.9485207 | -3.202097  |
| PDZD2      | -1.2410015 | -0.9718706 | 1.7307273       | 0.13682331 | 3.4032292 | -2.784261  |
| TMEM40     | -1.2311027 | -1.4392341 | 1.0187767       | 0.23622842 | 2.5625994 | -1.1472675 |

|                  |            |            |                 |                      |           |            |
|------------------|------------|------------|-----------------|----------------------|-----------|------------|
| NAV2-AS2         | -1.5380079 | -1.9699925 | 0.2564761       | 0.2893898            | 2.9621346 | NaN        |
| TCHH             | -1.3179518 | -1.7291778 | 0.80096734      | 0.04889390<br>2      | 3.3615885 | -1.1643201 |
| C1orf95          | -1.9121823 | -1.514092  | 0.7827664       | 0.10786062<br>5      | 3.230067  | -0.6944198 |
| RND3             | -1.6834618 | -1.4828176 | 0.25966632      | 0.6883935            | 2.5327551 | 0.31453562 |
| DDX80L           | -1.6531256 | -1.2550355 | 0.24833995      | 0.721917             | 2.489326  | -0.5514218 |
| BTBD19           | -1.5392642 | -1.1036992 | 0.77282697      | -0.1821865           | 2.5342898 | 0.48196685 |
| LINC00456        | -1.5052557 | -0.9372404 | 0.08277751<br>5 | -<br>0.31528786      | 2.6750064 | NaN        |
| C1QTNF8          | -1.0499498 | -1.3331771 | 0.08300948      | 0.03351843<br>4      | 3.1315765 | -0.8649776 |
| OPHN1            | -0.7527505 | -1.5399107 | 0.43901783      | -<br>0.00302584<br>5 | 2.431114  | -0.5744447 |
| KIAA0513         | -1.2466872 | -1.7703719 | 0.65982014      | 0.4432071            | 2.113411  | 0.19937916 |
| CORO6            | -0.8971628 | -1.6186543 | 0.861916        | 0.36388823           | 1.7009248 | 0.41091195 |
| SLC52A3          | 0.92498904 | -1.2003394 | 1.2112641       | 0.40112284           | 1.3924148 | -0.8794734 |
| AHR              | -1.2073641 | -0.6651328 | 0.3812052       | 0.8126788            | 1.3901583 | -0.7115454 |
| PTPN3            | -0.9925945 | -0.8897841 | 0.34897923      | 0.39887762           | 1.2850306 | 0.15050888 |
| MMAA             | 0.77313805 | 0.87581515 | 0.344753        | 0.07849553           | 1.8571519 | -0.4744561 |
| LGALS8           | -0.6396121 | -0.8789517 | 0.03594159<br>7 | 0.06769704           | 1.7769657 | 0.36204058 |
| ZNF91            | -0.8050284 | 0.74200726 | 0.02732651      | 0.04462222<br>8      | 1.7782933 | 0.30320638 |
| TAB3             | -0.4902263 | -0.6079214 | 0.06731907      | 0.05275734           | 1.5286711 | 0.41596165 |
| CALCOCO<br>1     | 0.59683055 | -0.5576529 | -0.1868159      | 0.29094562           | 1.6267303 | -0.5763766 |
| TMBIM1           | -1.0127681 | -0.8527115 | 0.21817477      | 0.563013             | 1.9514407 | 0.43079934 |
| INSR             | 0.43935192 | -0.8641373 | 0.08222854      | 0.5734552            | 2.1957803 | -1.3835176 |
| CTA-<br>384D8.31 | 0.3444299  | NaN        | -1.2530932      | -2.1206439           | 3.0293074 | NaN        |
| CARD16           | 1.9207737  | -3.0077684 | 0.10322784      | 0.3511496            | 2.0271697 | -1.1880968 |

**Supplemental Table 2.** Spreadsheet of gene expression profiles from RNASeq in 2D and 3D cultures of JEG-3 cells, PHT cells, and 3D cultures of HBMECs. These genes were identified using GSEA followed by Pavlidis Template matching (PTM), with the genes from Table S5 as a template (PTM *P*-value <0.01). Data are shown as log<sub>2</sub> transformed RPKM values.

**Supplemental Dataset 1.** Spreadsheet from RNASeq studies of 2D and 3D cultures of JEG-3 cells, PHT cells, and 3D cultures of HBMECs. Shown are gene symbols, normalized expression values, and RPKM values from each condition.

**Supplemental Dataset 2.** Spreadsheet from differential expression analyses using DESeq2 of 2D and 3D cultures of JEG-3 cells. Shown are gene symbols from each condition as well as log2 fold changes, lfcSE, and p-values. These expression differences were prior to the removal of HBMEC-enriched genes by GSEA.

**Supplemental Dataset 3.** Spreadsheet from differential expression analyses using DESeq2 of 2D and 3D cultures of HBMECs. Shown are gene symbols from each condition as well as log2 fold changes, lfcSE, and p-values

**Supplemental Dataset 4.** Spreadsheet from differential expression analyses using DESeq2 of 2D cultures of JEG-3 cells and PHT cells. Shown are gene symbols, log2 fold changes, lfcSE, and p-values. These genes represent the 'PHT enriched library' used in subsequent GSEA studies.
